# Supplementary material for: Engineered PAM-flexible FnCas9 variants for robust and specific genome editing and diagnostics
Source: Research Square preprint supplement (doi:10.21203/rs.3.rs-990232/v1), 2021-10-20
Supplement: Supplementary file 1 [file 9b61f846e6790fe9b6005ed6.xlsx]

## Sheet: PAM_frequency
Used PAM for analysis	Nuclease name	Consensus PAM	Freqency in Human genome (GRCh38.p13)
ATTN	LsCas12b	ATTN	153178050
ATTN	BthCas12b	ATTN	153178050
ATTW	BvCas12b	ATTW	97699224
BGGDTNN	EfaCas9 *	B(T>G>C)GGD(A>T>G)TNN	39511230
BGGGTCD	Ghy1Cas9 *	BGGGTCD	1665877
BRRTTTW	CgaCas9 *	BRRTTTW	18208912
BRTTTTT	Cca1Cas9*	BRTTTTT	10118348
BTTV	MlCas12a	BTTV	277159703
CCD	CnCas12f1	CCD	242326515
CNAVGAC	BboCas9 *	CN(C>W>G)AV(A>S)GAC	2466513
CTT	RuCas12f1	CTT	124023683
DTTD	AacCas12b	DTTD	387367030
GNNNNCNNA	PmuCas9	GNNNNCNNA	73860445
HATT	EbCas12b	HATT	127724409
HGCNGCR	Ghc1Cas9 *	HGCNGCR	3616761
HHAAATD	WviCas9 *	HHAAATD	35112364
KARDAT	SpacCas9 *##	KARDAT	31197825
KKYV	PiCas12a	KKYV	557114406
NAA	Smu2Cas9	NAA	606275639
NAAAAY	TdeCas9	NAAAAY	37801329
NAAAG	Esp1Cas9 *	NAAAG	45398140
NAAN	SmacCas9	NAAN	606275409
NAANRCN	Ghy2Cas9 *	NAAN(A>T>S)RCN	55816794
NAARC	CglCas9 *	N(C>K>A)AARC	58227776
NAGANNN	Seq1Cas9 *	N(T>C>R)AGAN(A>K>C)NN	138357134
NAGNGC	Cme2Cas9 *	NAGNGC	17990324
NAGRGNN	NsaCas9 *	NAGRGN(T>V)N(T>C)	59393368
NARHHGN	PhiCas9 *	NAR(G>A)H(W>C)H(A>T>C)GN(C>T>R)	117575278
NARHHGN	Cca2Cas9 *	NAR(G>A)H(W>C)H(A>T>C)GN(C>T>R)	117575278
NARNCCN	Cme1Cas9 *	NARNCCN	46577647
NARTC	FfrCas9 *	NAR(A>G)TC	43922733
NARWAC	GheCas9 *	NAR(A>G)W(T>A)AC	30738059
NATARCH	VpaCas9 *	NATARCH	9215722
NATAWN	TpuCas9 *	NATAWN(A>T>S)	83536698
NATCCTN	Cme3Cas9 *	NATCCTN	6936399
NATGNT	LceCas9 *	NATGNT	32576810
NG	SpCas9-NG	NG	1274526342
NGG	Seq2Cas9 *	NGG	323956209
NGG	SmuCas9	NGG	323956209
NGG	Sag1Cas9 *	NGG	323956209
NGG	FnCas9	NGG	323956209
NGG	SpyCas9	NGG	323956209
NGG	LmoCas9 *	N(B>A)GG	323956209
NGGAHNN	EitCas9 *	N(G>T>M)GGAH(T>A>C)N(A>C>K)N	66231536
NGGDGNN	SraCas9 *	NGGD(A>T>G)GNN	73454083
NGGDH	SgaCas9 *	NGGD(A>T>G)H(T>M)	176796311
NGGDT	Smu3Cas9 *#	NGGDT	58510410
NGGDW	Sag2Cas9 *	NGGD(A>K)W(T>A)	132121624
NGGNG	SdyCas9 *	NGGNG	79379746
NGGNG	Sth3Cas9	NGGNG	79379746
NGGNNN	KhuCas9 *	N(C>D)GGN(T>A>G>C)NN	323955580
NGR	EnFnCas9	NGR	695364964
NGTGANN	CsaCas9 *	NGTGANN	26303595
NGTT	ShCas12k	NGTT C less preferred at 1st position	91328040
NHAAAA	PacCas9 *	NH(T>C>A)AAAA	78361201
NHAAAAA	SsuCas9 *	NH(T>M)AAAAA	35381841
NHAAAAA	SsiCas9 *	NHAAAAA	35381841
NHARMC	MseCas9 *	NHARMC	9053664
NHDTCCA	Nme2Cas9	NHDTCCA	18386861
NHGYNAN	SmaCas9 *	NHGYNAN(A>B)	114251049
NHGYRAA	Sth1ACas9 *	NHGYRAA	18360947
NMRNAY	Ghh1Cas9 *	N(C>D)M(A>C)RN(A>B)AY(C>T)	22702785
NNAAACN	TspCas9 *	NNAAACN	35443122
NNAAAG	SgoCas9 *	NNAAAG	45398126
NNAAAR	OrhCas9*	NNAAAR(G>A)	133722427
NNAGAAA	SsaCas9 *	NNAGAAA	19912351
NNAGAAW	Sth1Cas9	NNAGAAW	31627382
NNAHACN	JpaCas9 *	NNAH(T>M)ACN	81138694
NNDGGDN	BokCas9 *	NN(H>G)D(A>K)GGDN(A>B)	237113995
NNG	ScCas9	NNG (slight preference for A at 2nd position)	882866824
NNGAAAN	FhoCas9 *	NNGAAAN	46970638
NNGAC	FmaCas9 *	NNGAC	58652842
NNGAD	MgaCas9 *	NNGAD	312755426
NNGG	SluCas9	NNGG	323956076
NNGGG	ClaCas9	NNGGG	81629635
NNGHAAA	EceCas9 *	NNGH(W>C)AAA	32495670
NNGRRT	SauCas9	NNGRRT	90170416
NNGTAMY	BniCas9 *	NNGTAM(A>C)Y	1862396
NNGTGA	SpaCas9	NNGTGA	26303603
NNGWAY	Lsp1Cas9 *	NNGW(A>T)AY(T>C)	79247087
NNNATTT	TbaCas9 *	NNNATTT	61808020
NNNCAC	Ghh2Cas9 *	NNNCAC	94198365
NNNCAT	PlaCas9	NNNCAT	113351524
NNNCAT	Cme4Cas9 *	NNNCAT	113351524
NNNCC	AceCas9	NNNCC	323955882
NNNNATNANN	Ghc2Cas9 *	NNNNATN(W>S)ANN	137231686
NNNNCC	Nme2Cas9	NNNNCC	323955679
NNNNCCAA	TmoCas9 *	NNNNCCAA	27572993
NNNNCDAANN	GspCas9 *	NNNNCDAANN	73096721
NNNNCMCA	ThermoCas9	NNNNCNAA and NNNNCMCA with subtle preference for cytosine at first, third, fourth, and sixth PAM positions	8698941
NNNNCNAA	ThermoCas9	NNNNCNAA and NNNNCMCA with subtle preference for cytosine at first, third, fourth, and sixth PAM positions	100669782
NNNNCNDD	BlatCas9	NNNNCNDD	763544861
NNNNCRAA	GeoCas9	NNNNCRAA	49345900
NNNNCTA	CcoCas9 *	NNNNCTA	79537141
NNNNCTAA	KkiCas9 *	NNNNCTAA	23750889
NNNNCVGAA	CpeCas9 *	NNNNCVGAa	13714864
NNNNGATT	NmeCas9	NNNNGATT	25453616
NNNNGMAA	G. LC300 Cas9	NNNNGMAA	5886865
NNNNGNA	CcCas9	NNNNGNA	380421276
NNNNGTA	NciCas9	NNNNGTA	69578308
NNNNGYAA	DdeCas9 *	NNNNGYAA	45178805
NNNNRYAC	CjeCas9	NNNVRYM or NNNNRYAC (Kim et al.)	73872370
NNNTCCN	NspCas9 *	N(C>D)NNTCCN	96802879
NNNVRYM	CjeCas9	NNNVRYM or NNNNRYAC (Kim et al.)	53274089
NNRHHHY	CdCas9	NNRHHHY	778782200
NNRRCC	MscCas9 *	NNRRCC	76862309
NNTAAW	LrhCas9 *	N(T>V)NTAAW(A>T)	85934017
NNWHRTAAA	Ghy3Cas9 *	NNWHR(G>A)TA(not G)AA	13717086
NRG	LanCas9 *	NRG	759279295
NRG/NGR	EnFnCas9	NRG/NGR	1130688050
NRGNN	LpnCas9 *	NRGNN	759278506
NRN	SpRy	NRN	3105782588
NRRNAT	IgnaviCas9	NRRNAT	144617869
NRRNTT	SdoCas9 *	NRRNTT	140420811
NRTAW	AinCas9 *	NRTAW	125757520
NRTTTT	PspCas9*	NR(A>G)TTTT	37801339
NTGARNN	EdoCas9 *	NTGAR(G>A)N(A>Y>G)N(Y>R)	74031723
NTTR	AsCas12f1	NTTR	244203222
NVNDCCY	RspCas9*	NVNDCCY	107820631
NVRACCN	Esp2Cas9 *	NV(A>G>C)R(A>G)ACCN	25169934
NYAAA	LfeCas9	NYAAA	95678675
NYTV	Pb2Cas12a	TTTV (Zetsche et al.) and NYTV (Marshall & Maxwell et al.)	679828952
NYTV	McCas12a	NYTV	679828952
RGTG	AcCas12k	RGTG	52696167
RTR	Cas12h1	RTR	403465671
RTTN	BhCas12b	RTTN	244506067
RTTNT	AkCas12b	RTTNT	86212060
TA	Cas12d.1 (aka CasY.1)	TA	401733412
TATV	AsCas12a RR (S542/K607)	TATV	80804862
TBN	Cas12j-2 (aka CasPhi-2)	TBN	1429523025
TG	Cas12c1	TG	451838859
TG	OspCas12c	TG	451838859
TN	Cas12c2	TN	1831257737
TR	Cas12d.15	TR	853572271
TTAT	Mi1Cas12f2	TTAT	40674303
TTC	SpCas12f1	TTC	124326523
TTCN	PlmCas12e (aka PlmCasX)	TTCN	124326006
TTCN	DpbCas12e (aka DpbCasX)	TTCN	124326006
TTN	Mb3Cas12a	TTN	606275639
TTN	BsCas12a	TTN	606275639
TTN	BoCas12a	TTN	606275639
TTN	MbCas12a	TTN (Zetsche et al. ) or TTTN (Marshall & Maxwell et al.)	606275639
TTN	TsCas12a	TTN	606275639
TTN	Mb2Cas12a	TTN	606275639
TTN	Cas12i2	TTN	606275639
TTN	BrCas12b	TTN > TVT	606275639
TTN	Cas12i1	TTN	606275639
TTR	Mi2Cas12f2	TTR	244203293
TTTM	PdCas12a	TTTM (Zetsche et al.) or TTYV (Jacobsen et al.)	7559523
TTTN	LbCas12a	TTTN	237745735
TTTN	BfCas12a	TTTN	237745735
TTTN	EcCas12a	TTTN	237745735
TTTN	MbCas12a	TTN (Zetsche et al. ) or TTTN (Marshall & Maxwell et al.)	237745735
TTTR	Un1Cas12f1	TTTR	95678710
TTTR	Un2Cas12f1	TTTR	95678710
TTTR	AuCas12f2	TTTR	95678710
TTTTA	CMtCas12a	TTTTA	20412151
TTTV	Lb2Cas12a or Lb5Cas12a %	TTTV	142649412
TTTV	PsCas12a	TTTV	142649412
TTTV	Adurb193Cas12a	TTTV	142649412
TTTV	Adurb336Cas12a	TTTV	142649412
TTTV	AsCas12a	TTTV	142649412
TTTV	Pb2Cas12a	TTTV (Zetsche et al.) and NYTV (Marshall & Maxwell et al.)	142649412
TTV	CMaCas12a	TTV	368529816
TTV	FnCas12a	TTV	368529816
TTYV	PdCas12a	TTTM (Zetsche et al.) or TTYV (Jacobsen et al.)	217846858
TVT	BrCas12b	TTN > TVT	390305656
TYCV	AsCas12a RVR (S542R/K548R/N552R)	TYCV	137546315
VTTN	Cas12j-3 (aka CasPhi-3)	VTTN	368529674
VTTR	Cas12j-1 (aka CasPhi-1)	VTTR	148524512
YHHNGTH	Ghy4Cas9 *	YHHNGTH	76978430
YTN	Lb6Cas12a	YTN	1041598725
YTTN	AsCas12f1	YTTN	361769342
YTTR	PtCas12f1	YTTR	144862469
YTV	Fn3Cas12a	YTV	679829219
YYV	HkCas12a	YYV	1126616951
